# Supplementary material for: The effect of dissolved water on the viscosities of hydrophobic room-temperature ionic liquids
Source: Royal Society of Chemistry journal article supplement (doi:10.1039/b417348a), 2005-01-01
Supplement: b417348a.doc [file b417348a.doc]

**The effect of dissolved water on the viscosities of hydrophobic room-temperature ionic liquids**

Jason A. Widegren, Arno Laesecke and Joseph W. Magee*

Physical and Chemical Properties Division,

National Institute of Standards and Technology,

325 Broadway, Boulder, Colorado, USA.

Fax: +1 303 497 5224; Tel: +1 303 497 3298;

E-mail: magee@boulder.nist.gov

**Electronic Supplementary Information**

**Fig. S1** Percent deviations of the literature viscosity data1-13 *vs.* temperature for [C4mim][PF6] relative to the Vogel-Tammann-Fulcher (VTF) correlation of Seddon and co-workers.1 The literature data differ by 30% or more over much of the temperature range. Possible explanations for the disagreement among literature viscosity data are discussed in the main text. Note that the deviations of the data points reported by Huddleston et al.,3 Marsh et al.,7 and Suarez et al.9 cannot be explained by water contamination alone, because they correspond to unusually high viscosities. Additionally, the data from Okoturo and VanderNoot13 show deviations that are inconsistent with water contamination alone. The two data points from Huddleston et al. at 298 K are for a dried and a water equilibrated sample. It is not clear why their results differ so greatly from ours. In the same paper,3 Huddleston et al. also report an unusually high viscosity for [C4mim][Tf2N] at 298 K (see Figure S4).

**Fig. S2** Plot of the viscosity *vs.* temperature for [C4mim][PF6].1-13 These data were used to generate Figure S1. Our kinematic viscosities were converted to absolute viscosities using Seddon and co-workers’ values for density.1 We believe that most of the scatter in the viscosity data at 293 K (and, presumably, other temperatures) can be explained by water contamination. As mentioned above, the value from Marsh et al.7 is higher than our value, so that difference cannot be explained by water alone. However, the other five viscosity data points at 293 K are all lower than the viscosity we obtained for our driest sample of [C4mim][PF6], which is consistent with water contamination. The viscosities we obtained at 30 and 1900 ppm water, combined with [C4mim][PF6]’s saturated water content at room temperature of about 23 000 ppm (2.3%),14 show that varying water content could explain all of the lower reported values for the viscosity at 293 K. We did not attempt viscosity measurements for [C4mim][PF6] at water contents higher than 1900 ppm (0.19%) because of concerns about PF6 hydrolysis.

**Fig. S3** Plot of the viscosity *vs.* temperature for [C2mim][Tf2N].4,6,15-18 Our kinematic viscosities were converted to absolute viscosities using Gmehling and co-workers’ value for density, 1524.3 kg/m3 at 293.15 K.19 At 293.16 K, Noda and co-workers’ value for absolute viscosity is 39.0 mPa∙s (no estimate of uncertainty was given), compared to our value at 293.15 K and 10 ppm water of 39.4 mPa∙s (with an estimated uncertainty of 1%). Hence, Noda and co-workers’ value for viscosity agrees with our value. The other two values at 293 K are both 34 mPa∙s (no estimate of uncertainty was given), which is about 14% lower than our value. If we assume that this difference is entirely due to a difference in water content, then we can use the viscosity *vs.* water content data to estimate that these two literature samples contained about 0.4 wt% water (4000 ppm). Near room temperature, the saturated water content of [C2mim][Tf2N] is about 14 000 ppm (1.4%).15

**Fig. S4** Plot of the viscosity *vs.* temperature for [C4mim][Tf2N].3-5,15 Our kinematic viscosities were converted to absolute viscosities using Gmehling and co-workers’ value for density, 1442.5 kg/m3 at 293.15 K.19 At 293.15 K, Bonhôte and co-workers’ value for the absolute viscosity is 52 mPa∙s (with an estimated uncertainty of 5%), compared to our value of 63.5 mPa∙s (with an estimated uncertainty of 1%). Bonhôte and co-workers’ value is about 18% lower than our value so, clearly, the uncertainties for the two measurements do not overlap. If we assume that this difference is entirely due to a difference in water content, then we can use the viscosity *vs.* water content data to estimate that the literature sample contained about 0.5 wt% water (5000 ppm). Near room temperature, the saturated water content of [C4mim][Tf2N] is about 14 000 ppm (1.4%).15 The two data points from Huddleston et al. at 298 K are for a dried and a water equilibrated sample. It is not clear why their results differ so greatly from ours. In the same paper,3 Huddleston et al. also report an unusually high viscosity for [C4mim][PF6] at 298 K (see Figures S1 and S2).

**References for the Electronic Supplementary Information:**

(1) K. R. Seddon, A. Stark, M.-J. Torres, *ACS Symposium Series*, 2002, **819**, 34.

(2) J. Zhang, W. Wu, T. Jiang, H. Gao, Z. Liu, J. He, B. Han, *J. Chem. Eng. Data*, 2003, **48**, 1315.

(3) J. G. Huddleston, A. E. Visser, W. M. Reichert, H. D. Willauer, G. A. Broker, R. D. Rogers, *Green Chemistry*, 2001, **3**, 156.

(4) S. V. Dzyuba, R. A. Bartsch, *CHEMPHYSCHEM*, 2002, **3**, 161.

(5) A. J. McLean, M. J. Muldoon, C. M. Gordon, I. R. Dunkin, *Chem. Commun*., 2002, 1880.

(6) R. A. Reich, P. A. Stewart, J. Bohaychick, J. A. Urbanski, *Lubrication Engineering*, July 2003, 16.

(7) K. N. Marsh, J. A. Boxall, R. Lichtenthaler, *Fluid Phase Equilib*., 2004, **219**, 93.

(8) S. N. Baker, G. A. Baker, M. A. Kane, F. V. Bright, *J. Phys. Chem. B*, 2001, **105**, 9663.

(9) P. A. Z. Suarez, S. Einloft, J. E. L. Dullius, R. F. de Souza, J. Dupont, *J. Chim. Phys.*, 1998, **95**, 1626.

(10) L. C. Branco, J. N. Rosa, J. J. Moura Ramos, C. A. M. Afonso, *Chem. Eur. J*., 2002, **8**, 3671.

(11) A. G. Fadeev, M. M. Meagher, *Chem. Commun*., 2001, 295.

(12) D. Behar, C. Gonzalez, P. Neta, *J. Phys. Chem. A*, 2001, **105**, 7607.

(13) O. O. Okoturo, T. J. VanderNoot, *J. Electroanal. Chem.*, 2004, **568**, 167.

(14) J. L. Anthony, E. J. Maginn, J. F. Brennecke, *J. Phys. Chem. B*, 2001, **105**, 10942-10949.

(15) P. Bonhôte, A.-P. Dias, N. Papageorgiou, K. Kalyanasundaram, M. Grätzel, *Inorg. Chem*., **1996**, *35*, 1168.

(16) A. B. McEwen, H. L. Ngo, K. LeCompte, J. L. Goldman, *J. Electrochem. Soc.*, **1999**, *146*, 1687.

(17) J. M. Pringle, J. Golding, K. Baranyai, C. M. Forsyth, G. B. Deacon, J. L. Scott, D. R. MacFarlane, *New J. Chem*., **2003**, *27*, 1504.

(18) A. Noda, K. Hayamizu, M. Watanabe, *J. Phys. Chem. B*, **2001**, *105*, 4603.

(19) M. Krummen, P. Wasserscheid, J. Gmehling, *J. Chem. Eng. Data*, 2002, **47**, 1411-1417.
